# Supplementary material for: Unprecedented optically induced long-lived intramolecular electron transfer in cobalt–dioxolene complexes
Source: Royal Society of Chemistry journal article supplement (doi:10.1039/b702932b), 2007-01-01
Supplement: b702932b.pdf [file b702932b.pdf]

# Electron Supplementary Information

## **Unprecedented Optically Induced Long-Lived Intramolecular Electron Transfer In Cobalt-Dioxolene Complexes**

**Alessandra Beni, Andrea Dei, Mario Rizzitano and Lorenzo Sorace**

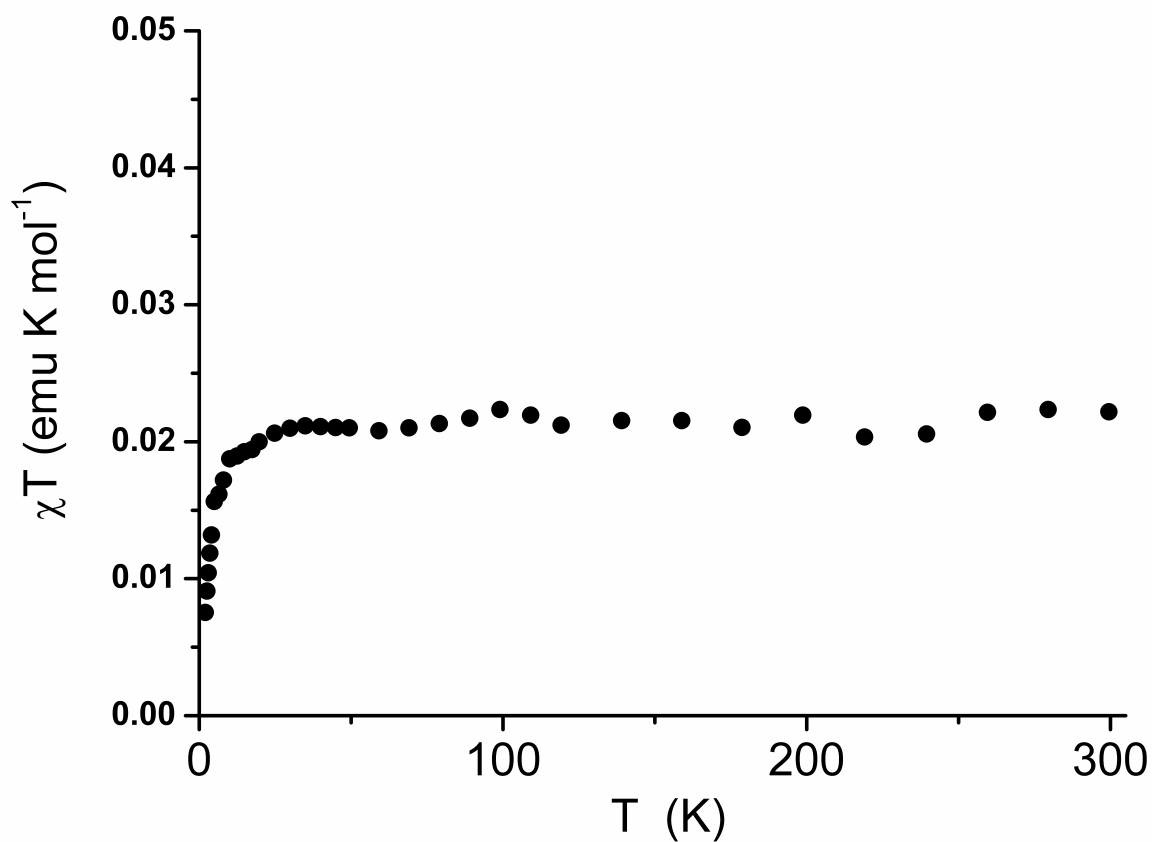

**Figure S1**  $\chi T$  vs T plot for  $[\text{Co}(\text{Metpa})(\text{Phencat})]\text{PF}_6$
